# Supplementary material for: Rapid and label-free fluorescence bioassay for microRNA based on exonuclease III-assisted cycle amplification
Source: Royal Society of Chemistry journal article supplement (doi:10.1039/c8ra01605d), 2018-01-01
Supplement: c8ra01605d1.pdf [file c8ra01605d1.pdf]

## Rapid and free-label fluorescence bioassay for microRNA based on Exonuclease III-assisted cycle amplification

Mingxiu Liu, Shuping Liang, Yafang Tang, Jianniao Tian\*, Yanchun Zhao\*, Shulin

Zhao

State Key Laboratory for Chemistry and Molecular Engineering of Medicinal  
Resources, School of Chemistry and Pharmaceutical Science of Guangxi Normal  
University, Guilin 541004, China

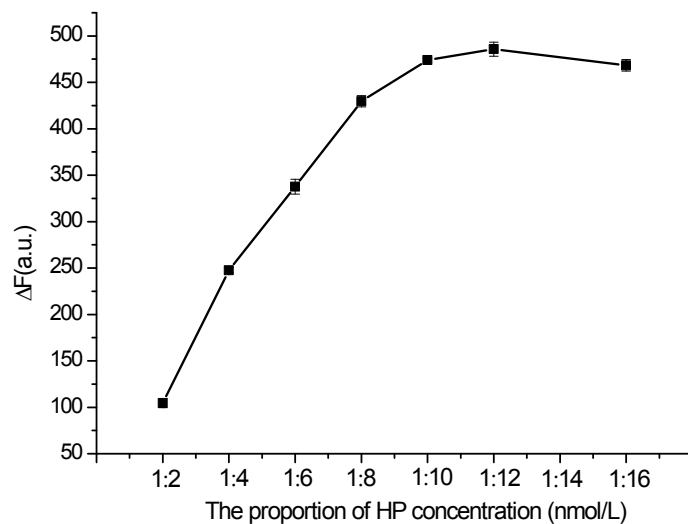

**Figure S1** The effect of HP concentration on fluorescence changes ( $\Delta F$ ). The concentrations of Exo III, miRNA-122, NMM are 4 U, 15 nM, 2  $\mu$ M.

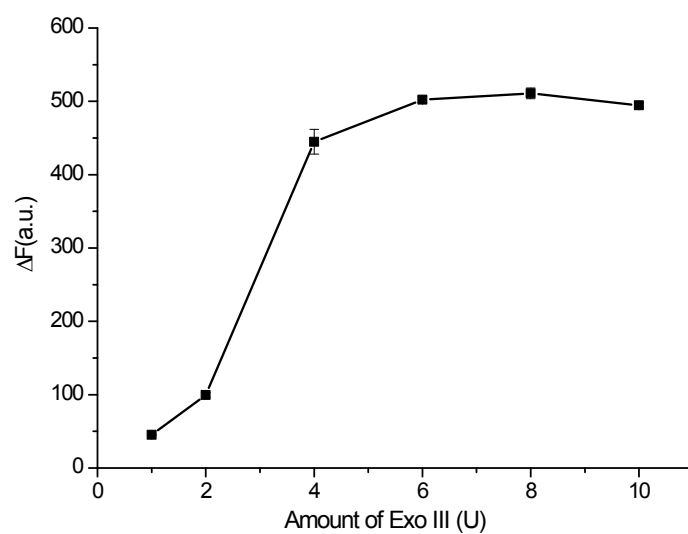

**Figure S2** Amount of Exo III on fluorescence changes ( $\Delta F$ ). The concentrations of HP1, HP2, miRNA-122, NMM are 50 nM, 600 nM, 15 nM, 2  $\mu$ M.

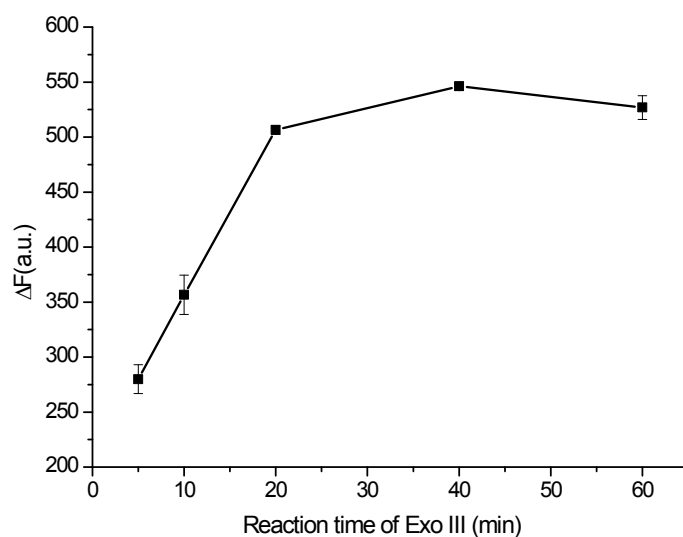

**Figure S3** Reaction time of Exo III on fluorescence changes ( $\Delta F$ ). The concentrations of HP1, HP2, Exo III, miRNA-122, NMM are 50 nM, 600 nM, 6 U, 15 nM, 2  $\mu$ M.

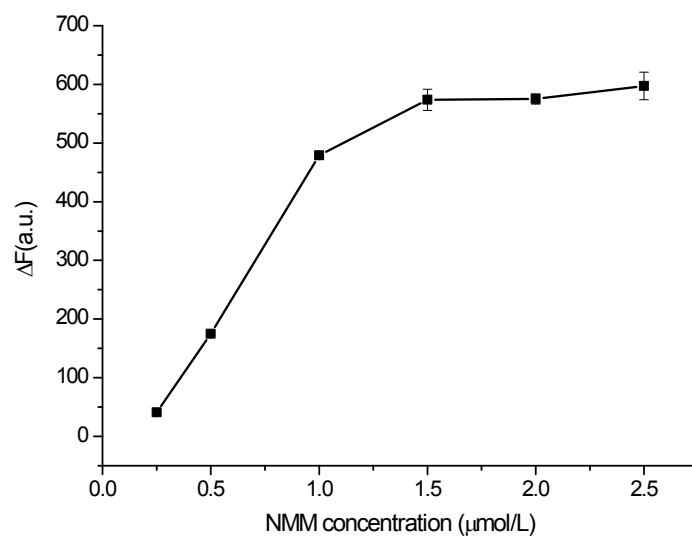

**Figure S4** The concentration of NMM on fluorescence changes ( $\Delta F$ ). The concentrations of HP1, HP2, miRNA-122, Exo III are 50 nM, 600 nM, 15 nM, 6 U.

Table S1 The comparison of miRNA detection methods

| Method            | Mechanism                                                             | Linear range | LOD     | Time           | Reference |
|-------------------|-----------------------------------------------------------------------|--------------|---------|----------------|-----------|
| Chemiluminescence | CRET and WS <sub>2</sub> nanosheet                                    | 0.5–10 nM    | 180 pM  | 3 h and 6 min  | [1]       |
| Fluorescence      | MnO <sub>2</sub> nanosheets and CHA                                   | 1-50 nM      | 0.33 nM | 2 h            | [2]       |
| Fluorescence      | target-triggered free-enzymatic amplification and GO                  | 0.01~100 nM  | 10 pM   | 6 h and 10 min | [3]       |
| Electrochemical   | sandwich detection onto magnetic microcarriers and HCR                | 0.2-5 nM     | 60 pM   | 1 h and 48 min | [4]       |
| Fluorescence      | Gold Nanoparticles                                                    | 3.8 pM-10 nM | 3.8 pM  | 7 h and 10 min | [5]       |
| Fluorescence      | Graphene Quantum Dots and Pyrene-Functionalized Molecular             | 0.1-200 nM   | 100 pM  | 2 h and 40 min | [6]       |
| Fluorescence      | G-quadruplex and Exonuclease III to achieve dual signal amplification | 0.25-4 nM    | 6 pM    | 1 h            | This work |

## References

- [1] J. Zhao, X. Jin, M. Vdovenko, L. Zhang, I. Y. Sakharov and S. Zhao, *Chem. Commun.*, 2015, **51**, 11092-11095.
- [2] W. Ouyang, Z. Liu, G. Zhang, Z. Chen, L. Guo, Z. Lin, B. Qiu and G. Chen, *Anal. Methods*, 2016, **8**, 8492-8497.
- [3] R. Huang, Y. Liao, X. Zhou and D. Xing, *Anal Chim Acta*, 2015, **888**, 162-172.
- [4] R. M. Torrente-Rodriguez, S. Campuzano, V. R. Montiel, J. J. Montoya and J. M. Pingarron, *Biosens. Bioelectron.*, 2016, **86**, 516-521.
- [5] W. Wang, T. Kong, D. Zhang, J. Zhang and G. Cheng, *Anal Chem*, 2015, **87**, 10822-10829.
- [6] H. Zhang, Y. Wang, D. Zhao, D. Zeng, J. Xia, A. Aldalbahi, C. Wang, L. San, C. Fan, X. Zuo and X. Mi, *ACS Appl. Mater. Interfaces*, 2015, **7**, 16152-16156.
